# Supplementary material
Source: Frontiers journal article supplement (https://www.frontiersin.org/articles/441600)
Supplement: Data_Sheet_1.PDF [file Data_Sheet_1.PDF]

| Age Group                | 20-34         | 35-49         | 50-64         | 65-79         | 80+           | P-value |
|--------------------------|---------------|---------------|---------------|---------------|---------------|---------|
|                          | (n=13)        | (n=11)        | (n=12)        | (n=12)        | (n=10)        |         |
| Gender                   | <i>M8, F5</i> | <i>M7, F4</i> | <i>M7, F5</i> | <i>M8, F4</i> | <i>M6, F4</i> | 0.9949  |
| Age, year                | 27.2 ± 3.3    | 41.3 ± 4.5    | 57.1 ± 4.7    | 70.3 ± 2.3    | 82.4 ± 2.4    | <0.0001 |
| Race                     | 9C, 2AA, 2A   | 5C, 6AA       | 8C, 4AA       | 10C, 1AA, 1A  | 9C, 1AA       | 0.0958  |
| BMI, kg/m <sup>2</sup>   | 25.9 ± 2.8    | 26.4 ± 2.6    | 26.6 ± 3.2    | 26.4 ± 2.4    | 25.2 ± 3.9    | 0.9533  |
| Weight/circuit training* | 166 ± 188     | 301 ± 391     | 90 ± 45       | 62 ± 56       | 48 ± 10       | 0.3777  |
| Vigorous exercise*       | 151 ± 176     | 33 ± 53       | 30 ± 66       | 120 ± 131     | 135 ± 158     | 0.0857  |
| Brisk walking*           | 66 ± 95       | 79 ± 86       | 130 ± 205     | 77 ± 120      | 123 ± 165     | 0.8957  |
| Casual walking*          | 158 ± 128     | 195 ± 170     | 310 ± 284     | 172 ± 165     | 209 ± 156     | 0.4825  |
| †Physical Activity       | 1.8 ± 1.4     | 1.8 ± 1.3     | 2 ± 1.1       | 2.3 ± 1       | 1.5 ± 1.1     | 0.5145  |

**Table S1) Baseline characteristics of the GESTALT skeletal muscle age group donors.** The participants are classified into 5 different age groups. Gender: The number of donors is represented in numeric, *M* is Male, *F* is Female. Age in years: Average age across group and standard deviation (SD ±) for each age group. Race: number of donors is shown in left and race is shown in italics, *C* is Caucasian, *AA* is African American, and *A* is Asian. Body Mass Index (BMI): average BMI across the age group and SD (±) for each group is shown.

\*Activity expressed in minutes/week as mean ± SD

†Physical activity is calculated from the sum of weight circuit, vigorous exercise, brisk walking and casual walking as high intensity exercise min/wk (highxmin). This is further categorized into 0, 1, 2, and 3 ; 0 = highxmin < 30, 1 = 30 ≤ highxmin < 75, 2 = 75 ≤ highxmin < 150, 3 = 150 ≤ highxmin.
